# Supplementary material
Source: Springer Nature journal article supplement (https://www.springermedizin.de/resource/supplementary/13058_2011_2872_MOESM3_ESM.pdf/9702768)

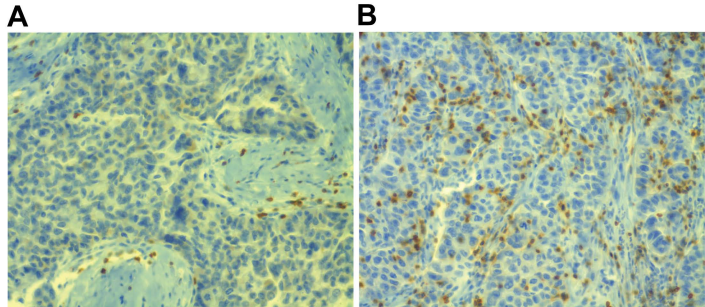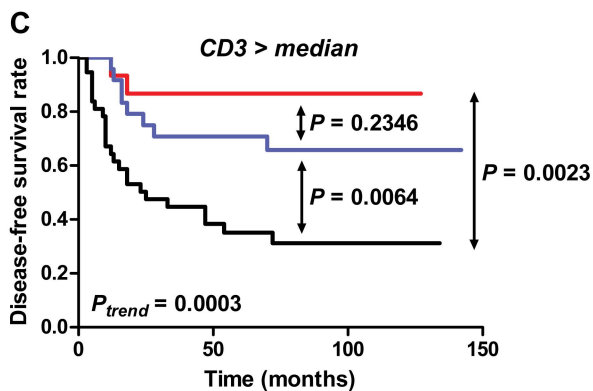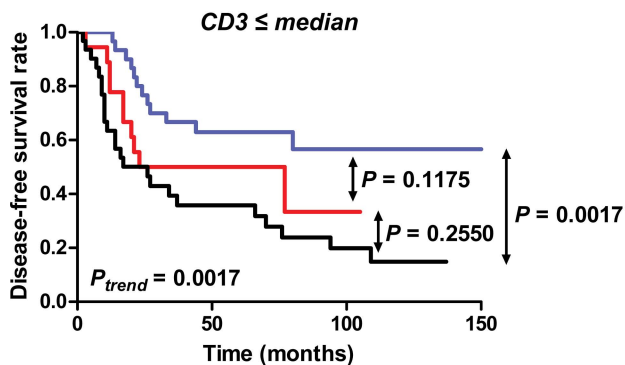

— Anthracycline-based therapy    — CMF therapy  
 — No chemotherapy

Supplement: MOESM3 [file 9702768]
